# Supplementary material for: Deep-learning based 3-year survival prediction of pineoblastoma patients
Source: Research Square preprint supplement (doi:10.21203/rs.3.rs-3369434/v1), 2023-09-27
Supplement: Supplementary file 1 [file c1f10b270d8e43d32494fa60.pdf]

**Table 1 The baseline characteristics of patients**

| <b>Characteristics</b>                                  | <b>Total<br/>N=145</b> |
|---------------------------------------------------------|------------------------|
| <b>Age group</b>                                        |                        |
| <10 years                                               | 41 (28.3%)             |
| 10-19 years                                             | 27 (18.6%)             |
| 20-39 years                                             | 48 (33.1%)             |
| ≥40 years                                               | 29 (20.0%)             |
| <b>Gender</b>                                           |                        |
| Male                                                    | 75 (51.7%)             |
| Female                                                  | 70 (48.3%)             |
| <b>Race</b>                                             |                        |
| White                                                   | 103 (71.0%)            |
| Black                                                   | 24 (16.6%)             |
| Asian or Pacific Islander/American Indian/Alaska Native | 18 (12.4%)             |
| <b>Tumorsize</b>                                        |                        |
| <3cm                                                    |                        |
| ≥3cm                                                    |                        |
| <b>Tumorextension</b>                                   |                        |
| Localized                                               | 94 (64.8%)             |
| Regional                                                | 28 (19.3%)             |
| Distant                                                 | 17 (11.7%)             |
| Unknown                                                 | 6 (4.1%)               |
| <b>Monthsfromdiagnosistotreatment</b>                   |                        |
| < 1 month                                               | 89 (61.4%)             |
| ≥ 1months                                               | 51 (35.2%)             |
| Unknown                                                 | 5 (3.4%)               |
| <b>Surgery</b>                                          |                        |
| No surgery                                              | 24 (16.6%)             |
| Local tumor destruction                                 | 14 (9.7%)              |
| STR/PTR                                                 | 50 (34.5%)             |
| GTR                                                     | 45 (31.0%)             |
| Surgery,NOS                                             | 12 (8.3%)              |
| <b>Radiotherapy</b>                                     |                        |
| No                                                      | 59 (40.7%)             |
| Yes                                                     | 80 (55.2%)             |
| Others                                                  | 6 (4.1%)               |
| <b>Chemotherapy</b>                                     |                        |
| No                                                      | 73 (50.3%)             |
| Yes                                                     | 72 (49.7%)             |
